# Supplementary material for: Modulating the catalytic activity of AMPK has neuroprotective effects against α-synuclein toxicity
Source: Springer Nature journal article supplement (doi:10.1186/s13024-017-0220-x), 2017-11-03
Supplement: MOESM4 [file 15190212]

**Figure S3**

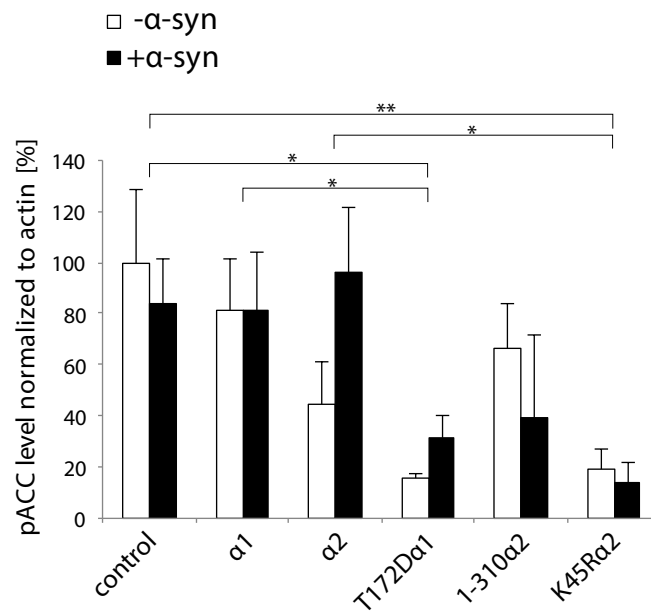

**Fig S3. Levels of phospho ACC in primary cortical neurons overexpressing AMPKα and α-syn**

Quantification of relative phospho ACC (pACC) levels analysed by western blotting (see Fig 1b for original blot). The pACC signal is normalized to actin. The pACC level is set at 100% in primary neurons transduced with the control non-coding AAV6 vector. Note the significant reduction of the pACC signal in neurons overexpressing AMPK T172Da1 and K45Ra2.

Values are expressed as mean±SEM. *Statistical analysis*: repeated measures two-way ANOVA with Fisher's LSD post hoc test; n=2 per condition; \*P<0.05, \*\*P<0.01.
