# Supplementary material for: Modulating the catalytic activity of AMPK has neuroprotective effects against α-synuclein toxicity
Source: Springer Nature journal article supplement (doi:10.1186/s13024-017-0220-x), 2017-11-03
Supplement: MOESM5 [file 15190212]

**Figure S4**

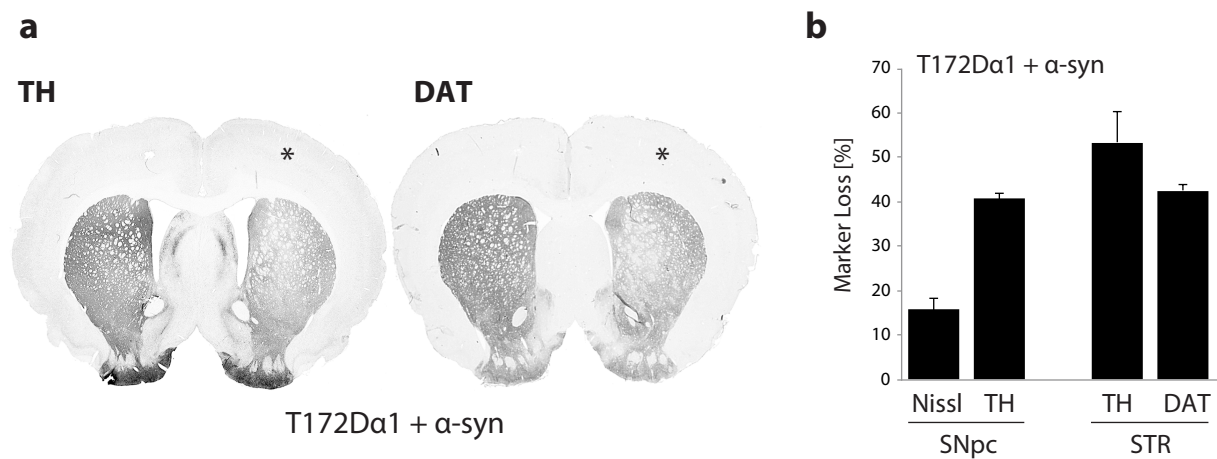

**Fig S4. Down-regulation of dopaminergic markers in the nigrostriatal system following overexpression of human  $\alpha$ -syn and T172Da1 AMPK subunit**

(a) Representative immunostaining for TH and DAT in the STR of an animal co-injected with AAV- $\alpha$ -syn and AAV-T172Da1.

(b) Comparison of the  $\alpha$ -syn-induced loss of nigral neurons and striatal fiber densitometry, using Nissl as well as the DAT and TH dopaminergic markers in rats co-injected with AAV- $\alpha$ -syn and AAV-T172Da1 (n=5 for each marker). Note the higher loss of dopamine marker immunoreactivity with respect to the loss of Nissl-stained neurons in the SNpc.

\* indicates the injected hemisphere.
