# Supplementary material for: Modulating the catalytic activity of AMPK has neuroprotective effects against α-synuclein toxicity
Source: Springer Nature journal article supplement (doi:10.1186/s13024-017-0220-x), 2017-11-03
Supplement: MOESM6 [file 15190212]

**Figure S5**

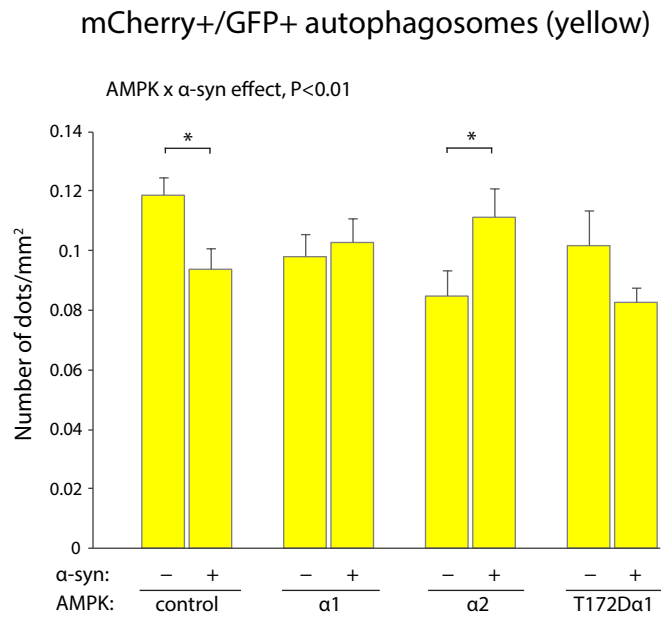

**Fig S5. Number of mCherry+/GFP+ autophagosomes in primary cortical neurons overexpressing AMPK $\alpha$  and/or  $\alpha$ -syn**

Quantification of the average number of EGFP-positive autophagosomes per cell, normalized to cytosol area. Note that in neurons overexpressing  $\alpha$ -syn, the number of autophagosomes remains similar across the different conditions, regardless of AMPK $\alpha$  overexpression.

Values are expressed as mean $\pm$ SEM. *Statistical analysis*: two-way factorial ANOVA with Fisher's LSD post hoc test; for each condition n=22-30 neurons from 3 separately infected wells; \* $P < 0.05$ .
