# Supplementary material for: Modulating the catalytic activity of AMPK has neuroprotective effects against α-synuclein toxicity
Source: Springer Nature journal article supplement (doi:10.1186/s13024-017-0220-x), 2017-11-03
Supplement: MOESM7 [file 15190212]

**Figure S6**

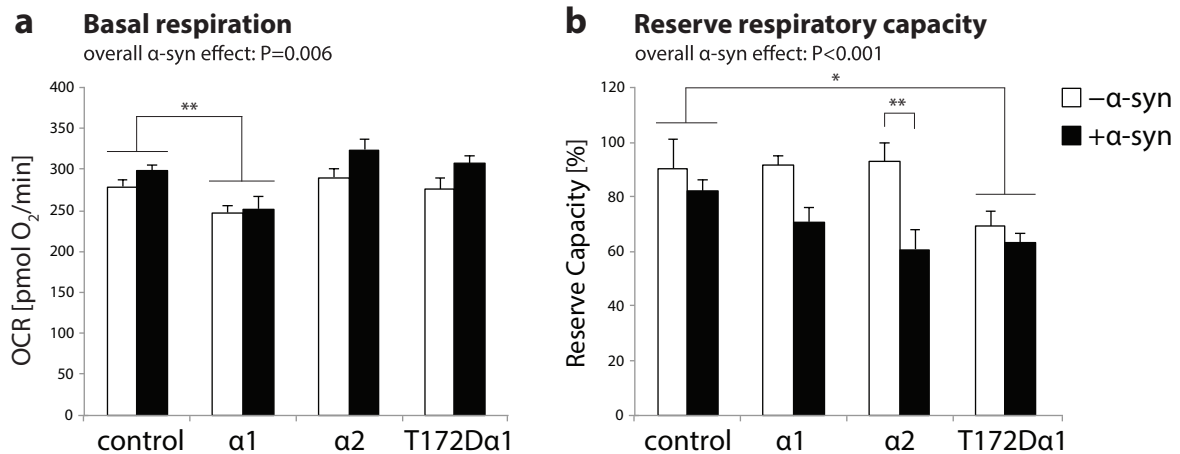

**Fig S6. Mitochondrial respiration in cortical neurons co-expressing AMPK $\alpha$  and  $\alpha$ -syn**

(a) Basal oxygen consumption rate (OCR), expressed as the mean of four measurements. Note that AMPK $\alpha 1$  overexpressing neurons have statistically lower basal OCR compared to control, whilst  $\alpha$ -syn induces an overall increase in OCR. Significant differences in the multiple comparisons are indicated on the graph for the AMPK and  $\alpha$ -syn effects.

(b) Reserve respiratory capacity of neurons across conditions, calculated as the percentage increase in OCR following CCCP exposure. Overexpression of  $\alpha$ -syn results in a significant decrease in the reserve respiratory capacity, in particular in neurons overexpressing AMPK $\alpha 1$  and  $\alpha 2$ . As compared to the control condition, neurons overexpressing T172Da1 show a lower reserve respiratory capacity, independently from  $\alpha$ -syn overexpression. Significant differences in the multiple comparisons are indicated on the graph for the AMPK and  $\alpha$ -syn effects.

*Statistical analysis:* two-way factorial ANOVA ( $\alpha$ -syn x AMPK $\alpha$ ) with Tukey's HSD post hoc test;  $n=10-12$  wells of separately infected neurons; \* $P<0.05$ , \*\* $P<0.01$ .
